# Supplementary figures and images for: Oxidative Stress Induces Bovine Endometrial Epithelial Cell Damage through Mitochondria-Dependent Pathways
Source: MDPI journal article supplement (doi:10.3390/ani12182444), 2022-09-16

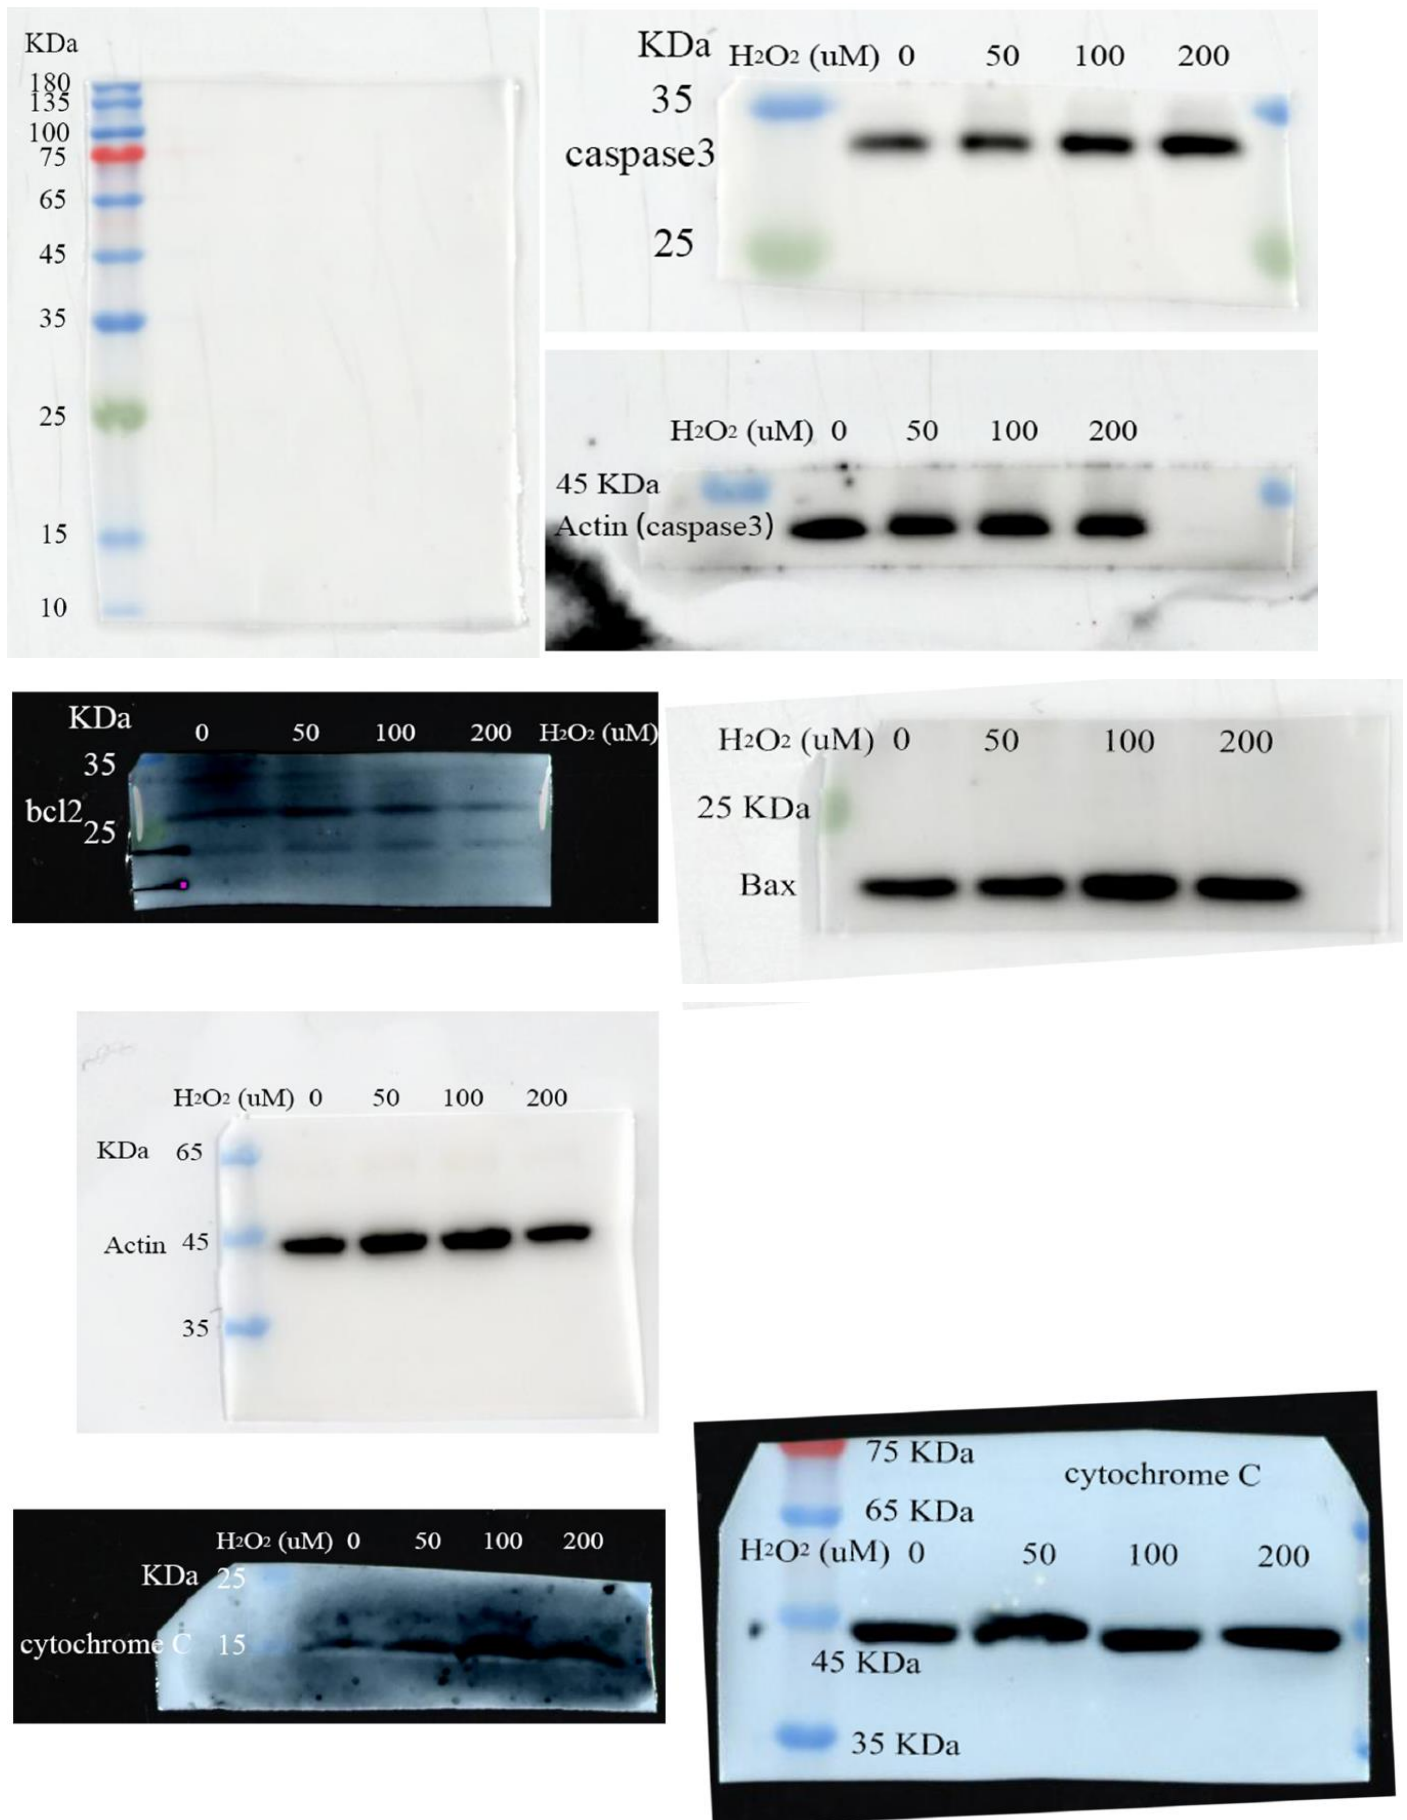

Figure S1: original Western Blot figures.

Supplement: s1 [file s1]
